# Supplementary material for: Three distinct open-pore morphologies from a single particle-filled polymer blend
Source: Royal Society of Chemistry journal article supplement (doi:10.1039/c5cp07576a), 2016-01-01
Supplement: c5cp07576a1.pdf [file c5cp07576a1.pdf]

### Online Supplementary Information

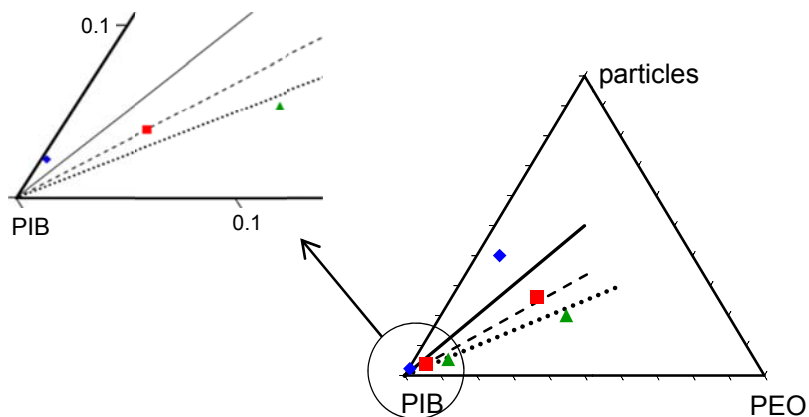

Fig. S1: The compositions examined in this paper represented on a ternary composition diagram. The upper left image is a magnified version of the PIB-rich vertex of the composition diagram. These same compositions are shown in Fig. 1 in rectilinear form. The three lines correspond to  $q = 0.5$  (solid),  $q = 1$  (dashed), and  $q = 1.5$  (dotted) respectively. These three lines are not intended to separate the three symbols; they are for illustration only.

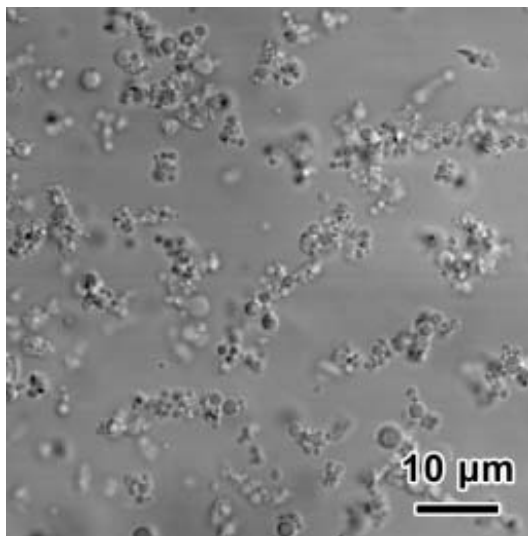

Fig. S2: DIC microscopy image of pendular aggregates corresponding to  $\phi_p = 0.022$  and  $q = 0.16$ .

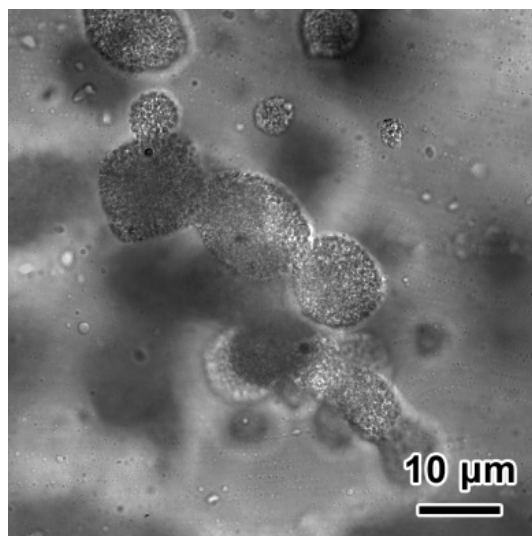

Fig. S3: DIC microscopy image of capillary aggregates corresponding to  $\phi_p = 0.04$  and  $\rho = 1$ .

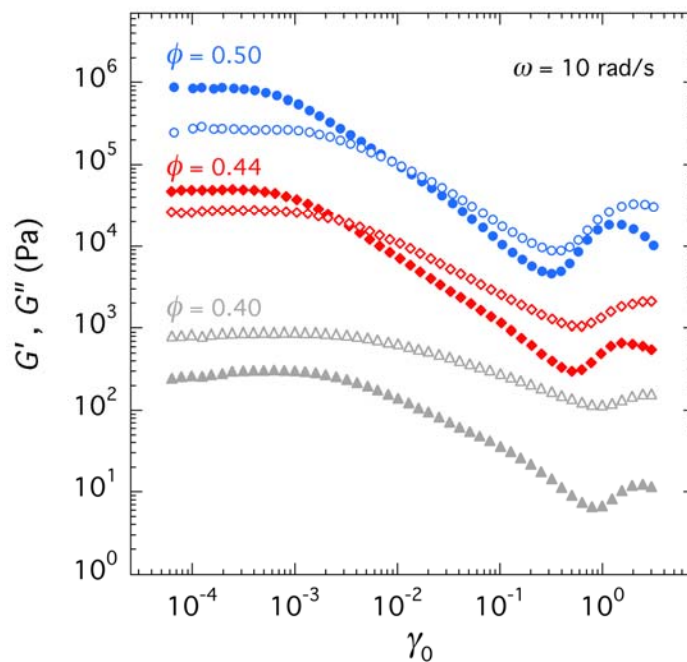

Fig. S4: Large amplitude oscillatory shear (LAOS) rheology of particle-PEO mixtures at 80°C at a frequency of 10 rad/s. The values of particle volume fraction are listed alongside each dataset. Note that these samples do not contain PIB at all.

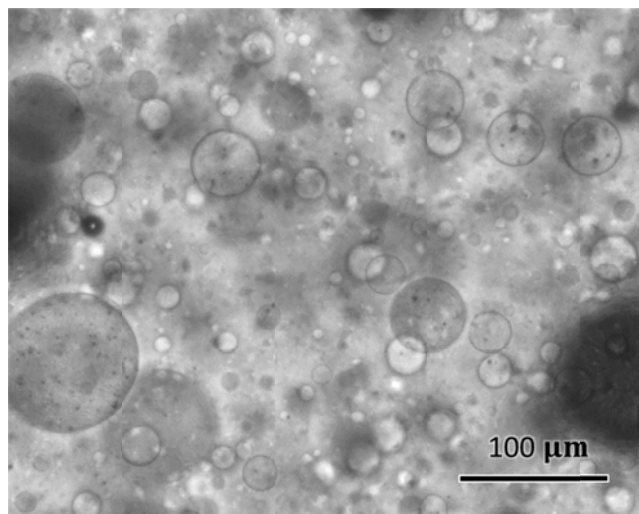

Fig. S5: Brightfield optical microscopy image of a particles-in-drops morphology for a sample with  $\phi_p = 0.054$  and  $q = 1.75$ . The grainy texture of the PEO drops is attributable to particles even though individual particles are not visible at this resolution.

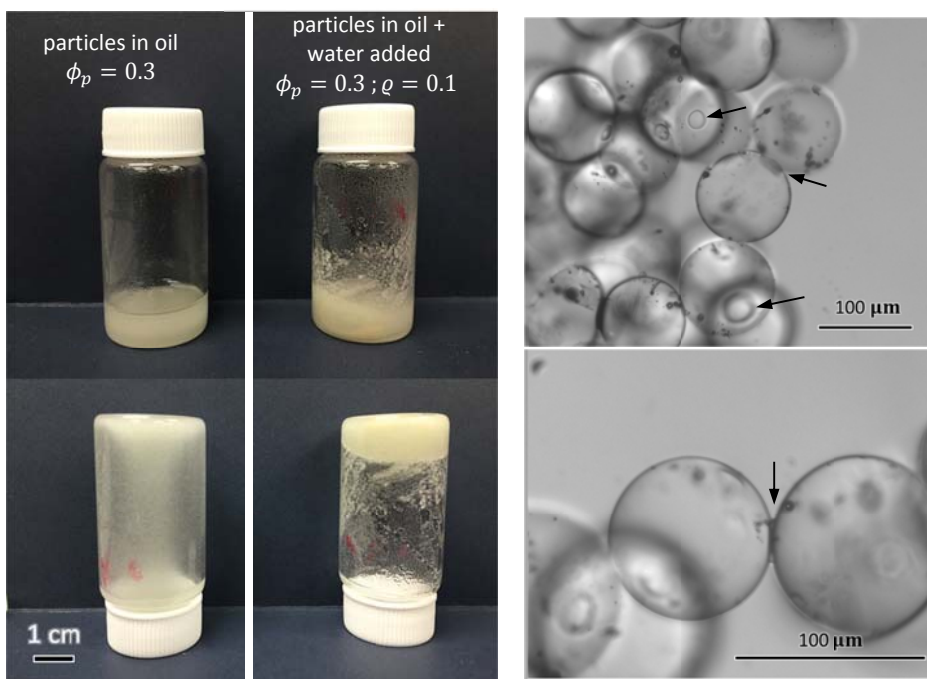

Fig. S6: Photographs of samples of glass particles in oil (leftmost column), and same with 3% water added (middle column). Note that the suspension can flow readily before water is added (leftmost column), but has a yield stress after water is added. Right: Brightfield microscope images of the sample in the middle column with ( $\phi_p = 0.3$  and  $q = 0.1$ ) showing water menisci (indicated by arrows) binding the particles together.

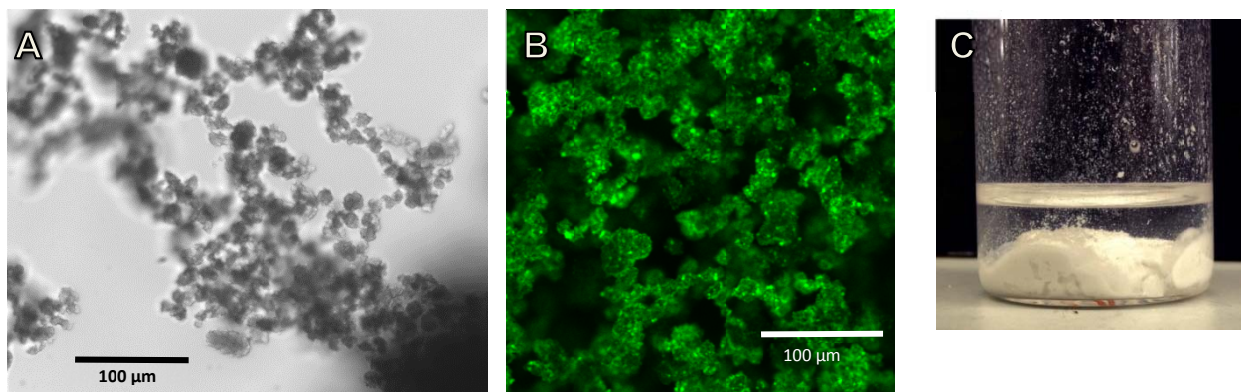

Fig. S7: Brightfield (A) and confocal (B) images of a capillary aggregate network prepared by mixing silica particles, mineral oil, and water with  $\phi_p = 0.086$ ;  $\phi_{oil} = 0.8$ ;  $\phi_{water} = 0.114$ . Since particles are fully-wetted by water,  $\varrho$  is defined as the ratio  $\varrho = \phi_{water}/\phi_p = 0.75$ . (A) was taken by squeezing the sample into a thin layer on a microscope slide to better-resolve the aggregates. (B) was taken on a thick slab of sample, and hence is more representative of the actual morphology. (C) Same system completely separates into two layers (oil layer atop a particle-in-water layer) at  $\varrho = 0.8$ .

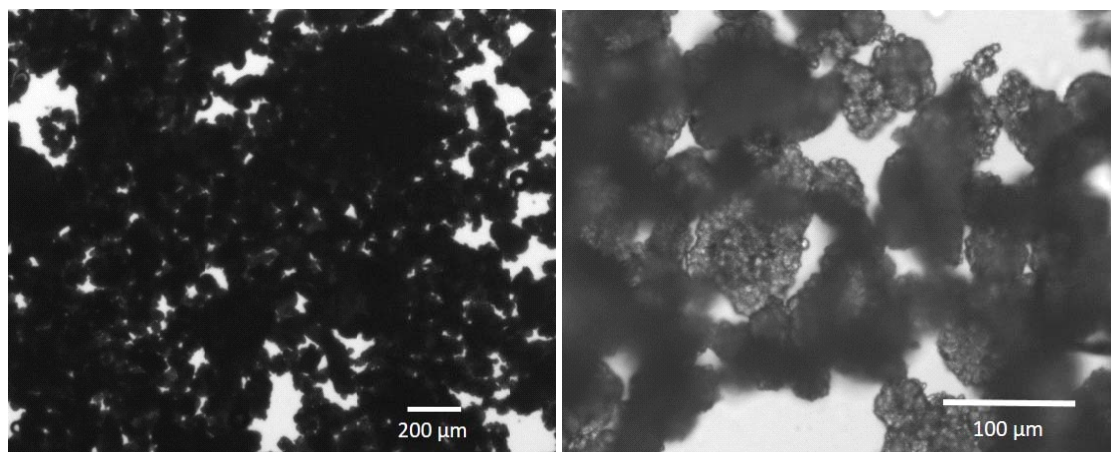

Fig. S8: Brightfield optical microscopy images at two different magnifications of capillary aggregates prepared by mixing polyethylene particles, mineral oil, and methanol with  $\phi_p = 0.13$ ;  $\phi_{oil} = 0.067$ ;  $\phi_{methanol} = 0.8$ . Since particles are fully-wetted by oil,  $\varrho$  is defined as  $\varrho = \phi_{oil}/\phi_p = 0.5$ .
